## Phylodynamic inference for emerging viruses using segregating sites

Authors: Yeongseon Park<sup>1</sup>, Michael Martin<sup>1</sup>, Katia Koelle<sup>2,3,\*</sup>

<sup>1</sup> Graduate Program in Population Biology, Ecology, and Evolution, Emory University, Atlanta, GA 30322

<sup>2</sup> Department of Biology, Emory University, Atlanta, GA 30322

<sup>3</sup> Emory-UGA Center of Excellence for Influenza Research and Surveillance (CEIRS), Atlanta GA, USA

\*[katia.koelle@emory.edu](mailto:katia.koelle@emory.edu)

*Key words: phylodynamic inference; segregating sites; infectious disease modeling; SARS-CoV-2*

## 1 **Abstract**

2 Epidemiological models are commonly fit to case data to estimate model parameters and to infer  
3 unobserved disease dynamics. More recently, epidemiological models have also been fit to viral  
4 sequence data using phylodynamic inference approaches that generally rely on the  
5 reconstruction of viral phylogenies. However, especially early on in an expanding viral population,  
6 phylogenetic uncertainty can be substantial and methods that require integration over this  
7 uncertainty can be computationally intensive. Here, we present an alternative approach to  
8 phylodynamic inference that circumvents the need for phylogenetic tree reconstruction. Our  
9 “tree-free” approach instead relies on quantifying the number of segregating sites observed in  
10 sets of sequences over time and using this trajectory of segregating sites to infer epidemiological  
11 parameters within a Sequential Monte Carlo (SMC) framework. Using forward simulations, we  
12 first show that epidemiological parameters and processes leave characteristic signatures in  
13 segregating site trajectories, demonstrating that these trajectories have the potential to be used  
14 for phylodynamic inference. We then show using mock data that our proposed approach  
15 accurately recovers key epidemiological quantities such as the basic reproduction number and  
16 the timing of the index case. Finally, we apply our approach to SARS-CoV-2 sequence data from  
17 France, estimating a reproductive number of approximately 2.2 and an introduction time of mid-  
18 January 2021, consistent with estimates from epidemiological surveillance data. Our findings  
19 indicate that “tree-free” phylodynamic inference approaches that rely on simple population  
20 genetic summary statistics can play an important role in estimating epidemiological parameters  
21 and reconstructing infectious disease dynamics, especially early on in an epidemic.

22

23

24

25

26

27

## 28 **Introduction**

29 Phylodynamic inference methods use viral sequence data to estimate epidemiological quantities  
30 such as the basic reproduction number and to reconstruct epidemiological patterns of incidence  
31 and prevalence. These inference methods have been applied to sequence data across a broad  
32 range of RNA viruses, including HIV (Stadler and Bonhoeffer 2013; Poppinga et al. 2014; Ratmann  
33 et al. 2017; Volz et al. 2017), ebola (Stadler et al. 2014; Vaughan et al. 2017; Volz and Siveroni  
34 2018), dengue (Rasmussen et al. 2014), influenza (Rasmussen and Stadler), and most recently  
35 severe acute respiratory syndrome coronavirus 2 (SARS-CoV-2)(Danesh et al. 2020; Miller et al.  
36 2020; Geidelberg et al. 2021). Most commonly, phylodynamic inference methods rely on  
37 underlying coalescent models or birth-death models. Coalescent-based approaches have been  
38 generalized to accommodate time-varying population sizes and parameter estimation for  
39 structured epidemiological models, for example, susceptible-exposed-infected-recovered (SEIR)  
40 models and models with spatial compartmentalization (Volz 2012; Volz and Siveroni 2018). Birth-  
41 death approaches (Stadler 2010; Stadler et al. 2012), where a birth in the context of infectious  
42 diseases corresponds to a new infection and death corresponds to a recovery from infection,  
43 instead carry other advantages, such as incorporating the role of demographic stochasticity in  
44 disease dynamics, which may be particularly important in emerging diseases that start with low  
45 infection numbers (Boskova et al. 2014). Both of these classes of phylodynamic inference  
46 approaches rely on time-resolved phylogenies and have been incorporated into the  
47 phylogenetics software package BEAST2 (Bouckaert et al. 2014: 2) to allow joint estimation of  
48 epidemiological parameters and dynamics while integrating over phylogenetic uncertainty  
49 (Stadler et al. 2013; Volz and Siveroni 2018). Integrating over phylogenetic uncertainty is crucial  
50 when applying these methods to viral sequence data that are sampled over a short period of time  
51 and contain only low levels of genetic diversity. However, integrating over phylogenetic  
52 uncertainty is computationally intensive. Moreover, phylodynamic approaches that use  
53 reconstructed trees for inference require estimation of parameters associated with models of  
54 sequence evolution, along with parameters that are of more immediate epidemiological interest.

55 Here, we present an alternative phylodynamic inference method that is particularly appropriate  
56 to use when viral sequences are sampled over short time periods and when phylogenetic  
57 uncertainty is considerable. This method does not rely on time-resolved phylogenies to infer  
58 epidemiological parameters or to reconstruct patterns of viral spread. Instead, the “tree-free”  
59 method we propose here fits epidemiological models to time series of the number of segregating  
60 sites observed in a viral population that is sampled over time. Like existing coalescent-based  
61 approaches, the approach we propose here allows for structured infectious disease models to be  
62 considered in a straightforward “plug-and-play” manner. Like existing birth-death process  
63 approaches, it incorporates the effect that demographic noise may have on epidemiological  
64 dynamics. Below, we first describe how segregating site trajectories are calculated using  
65 sequence data and how they are impacted by sampling effort, rates of viral spread, and  
66 transmission heterogeneity. We then describe our proposed phylodynamic inference method  
67 and apply it to simulated data to demonstrate the ability of this method to infer epidemiological  
68 parameters and to reconstruct unobserved epidemiological dynamics. Finally, we apply our  
69 segregating sites method to SARS-CoV-2 sequence data from France, arriving at quantitatively  
70 similar parameter estimates to those arrived at using epidemiological data.

## 71 **New Approaches**

72 Mutations occur during viral replication within infected individuals and these have the potential  
73 to be transmitted. During the epidemiological spread of an emerging virus, the virus population  
74 (distributed across infected individuals) thus accrues mutations and diversifies genetically. This  
75 joint process of viral spread and evolution can be simulated forward in time using compartmental  
76 models, with patterns of epidemiological spread leaving signatures in the evolutionary trajectory  
77 of the virus population. Parameters of these compartmental models that govern patterns of  
78 epidemiological spread can thus be estimated using observed viral evolutionary trajectories.  
79 Here, we develop a phylodynamic inference approach that fits compartmental epidemiological  
80 models to times series of a low-dimensional evolutionary summary statistic. Specifically, we use  
81 trajectories of the number of segregating sites from samples of the viral population taken over  
82 time for phylodynamic inference. In Materials and Methods, we provide details on the simulation

83 of epidemiological models that incorporate viral evolution and thus can yield simulated time  
84 series of the number of segregating sites. We further describe our phylodynamic inference  
85 approach that relies on using particle filtering (otherwise known as Sequential Monte Carlo; SMC)  
86 to infer parameters for these epidemiological models of arbitrary complexity and to reconstruct  
87 unobserved disease dynamics.

## 88 **Results**

### 89 **Segregating site trajectories are informative of epidemiological dynamics.**

90 Simulations of epidemiological models, as detailed in Materials and Methods, indicate that the  
91 number of segregating sites that are observed over time in a viral population are sensitive to  
92 sampling effort and are informative of epidemiological dynamics. To demonstrate this, we first  
93 simulated a susceptible-exposed-infected-recovered (SEIR) model under an epidemic scenario  
94 starting with a single infected individual (Figure 1A), further tracking the viral genotypes  
95 according to the approach outlined in Materials and Methods. The effect of sampling effort is  
96 shown in Figure 1B, which plots segregating site trajectories under dense sampling effort (40  
97 sequences per 4-day time window) and under sparse sampling effort (20 sequences per 4-day  
98 time window). At both of these sampling efforts, the number of segregating sites first increases  
99 as the epidemic grows, as expected, with mutations accumulating in the virus population.  
100 Following the peak of the epidemic, the number of segregating sites starts to decline as viral  
101 lineages die out, reducing the amount of genetic variation present in the viral population. At  
102 lower sampling effort, less of the genetic variation present in the viral population over a given  
103 time window is likely to be sampled, resulting in a lower number of observed segregating sites  
104 during any time window.

105 To assess whether segregating site trajectories could be used for phylodynamic inference, we  
106 first considered whether these trajectories differed between epidemics governed by different  
107 basic reproduction numbers ( $R_0$  values). Figure 1C shows simulations of the SEIR model under  
108 two parameterizations of the basic reproduction number: an  $R_0$  of 1.6, corresponding to the  
109 simulation shown in Figure 1A, and a higher  $R_0$  of 2.0. Differences in  $R_0$  were implemented by  
110 differences in the transmission rate. The epidemic with the higher  $R_0$  grew more rapidly (Figure

111 1C) and, under the same sampling effort, resulted in a more rapid increase in the number of  
112 segregating sites (Figure 1D). This indicates that segregating site trajectories can be informative  
113 of  $R_0$  early on in an epidemic.

114 We next considered the effect of transmission heterogeneity on segregating site trajectories.  
115 Many viral pathogens are characterized by ‘superspreading’ dynamics, where a relatively small  
116 proportion of infected individuals are responsible for a large proportion of secondary infections  
117 (Lloyd-Smith et al. 2005). The extent of transmission heterogeneity is often gauged relative to  
118 the 20/80 rule (the most infectious 20% of infected individuals are responsible for 80% of the  
119 secondary cases (Woolhouse et al. 1997)), with some pathogens like SARS-CoV-2 exhibiting  
120 extreme levels of superspreading, with as low as 6-15% of infected individuals responsible for 80%  
121 of secondary cases (Althouse et al. 2020; Miller et al. 2020; Lemieux et al. 2021; Sun et al. 2021).  
122 Because transmission heterogeneity is known to impact patterns of viral genetic diversity (Koelle  
123 and Rasmussen 2012), we simulated the above SEIR model with transmission heterogeneity to  
124 ascertain its effects on segregating site trajectories. Transmission heterogeneity was  
125 implemented using a negative binomial distribution parameterized such that the most infectious  
126 6% of infected individuals are responsible for 80% of the secondary cases (Materials and  
127 Methods). Because transmission heterogeneity has a negligible impact on epidemiological  
128 dynamics once the number of infected individuals is large (Keeling and Rohani 2008), these  
129 simulated epidemiological dynamics should be quantitatively similar to one another, with  
130 transmission heterogeneity simply expected to shorten the timing of epidemic onset in  
131 simulations with successful invasion (Lloyd-Smith et al. 2005). Our simulations confirm this  
132 pattern (Figure 1E). To compare segregating site trajectories between these simulations, we  
133 therefore shifted the simulation with transmission heterogeneity later in time such that the two  
134 simulated epidemics peaked at similar times (Figure 1E). Comparisons of segregating site  
135 trajectories between these simulations indicated that transmission heterogeneity substantially  
136 decreases the number of segregating sites during any time window (Figure 1F). These results  
137 indicate that the number of segregating sites in principle could be informative of the extent of  
138 transmission heterogeneity present in an unfolding epidemic. They also indicate that

139 transmission heterogeneity needs to be taken into consideration when estimating  
140 epidemiological parameters using segregating site trajectories.

141 Finally, we wanted to assess whether changes in  $R_0$  over the course of an epidemic would leave  
142 signatures in segregating site trajectories. We considered this scenario because phylodynamic  
143 inference has often been used to quantify the effect of public health interventions on  $R_0$ , most  
144 recently in the context of SARS-CoV-2 (Danesh et al. 2020; Miller et al. 2020). We thus  
145 implemented simulations with  $R_0$  starting at 1.6 and then either remaining at 1.6 or reduced to  
146 either 1.1 or 0.75 when the number of infected individuals reached 400 (Figure 1G). The  
147 segregating site trajectories for these three simulations indicate that reductions in  $R_0$  over the  
148 course of an epidemic leave faint signatures in this low-dimensional summary statistic of viral  
149 diversity, with the signature being more pronounced with a more precipitous drop in  $R_0$  (Figure  
150 1H).

#### 151 **Phylodynamic inference using segregating site trajectories**

152 To examine the extent to which phylodynamic inference based on segregating sites can be used  
153 for parameter estimation, we generated a mock segregating site trajectory by forward simulating  
154 an SEIR model with a  $R_0$  of 1.6, sampling viral sequences from this simulation (Figure 2A), and  
155 calculating a segregating site trajectory from these sampled sequences (Figure 2B). Because the  
156 duration of the exposed period and the duration of the infectious period are generally known for  
157 viruses undergoing phylodynamic analysis, we fixed these parameters at their true values and  
158 first attempted to estimate only  $R_0$  under the assumption that the timing of the index case  $t_0$  is  
159 known. We estimated an  $R_0$  value of 1.59 (95% confidence interval of 1.49 to 1.64; Materials and  
160 Methods; Figure 2C, 2C inset), demonstrating that phylodynamic inference using our segregating  
161 sites approach applied to this simulated dataset is able to recover the true  $R_0$  value of 1.6.

162 Because the timing of the index case is almost certainly not known for an emerging epidemic, we  
163 further attempted to estimate both  $R_0$  and  $t_0$  using the segregating site trajectory shown in Figure  
164 2B. To do this, we first considered the parameter space ranging from an  $R_0$  of 1.2 to 2.5 and from  
165 a  $t_0$  of 60 days prior to the true start date of 0 to 56 days following this true start date. Considering  
166  $R_0$  intervals of 0.02 and  $t_0$  intervals of 2 days, we ran 10 SMC simulations for every parameter

167 combination. In Figure 3A, we plot the mean value of these 10 SMC log-likelihoods for every  
168 parameter combination in the considered parameter space. Examination of this plot indicates  
169 that there is a log-likelihood ridge that runs between early  $t_0$ /low  $R_0$  parameter combinations and  
170 late  $t_0$ /high  $R_0$  parameter combinations. However, this ridge falls off on both edges, indicating  
171 that the segregating sites approach can in principle estimate both  $t_0$  and  $R_0$ . We therefore  
172 calculated profile likelihoods for both  $R_0$  and  $t_0$  (Figures 3B, 3C; Materials and Methods), arriving  
173 at an  $R_0$  estimate of 1.50 (95% confidence = 1.34 to 1.67; Figure 3B) and a  $t_0$  value of -13.8 (95%  
174 confidence = -27.8 to 0.3; Figure 3C) for the simulated dataset. While the maximum likelihood  
175 estimate for  $R_0$  ran low and for  $t_0$  ran early, the confidence intervals contained the true values of  
176  $R_0 = 1.6$  and  $t_0 = 0$ , respectively. Our results indicate that joint estimation of these parameters is  
177 thus possible. Using our estimates of  $R_0$  and  $t_0$ , we reconstructed the dynamics of the segregating  
178 sites (Figure 4A) and unobserved state variables: the number of susceptible, exposed, and  
179 infected individuals over time (Figures 4B, C, D). These reconstructed state variables captured  
180 the true epidemiological dynamics, demonstrating that our segregating sites phylodynamic  
181 inference approach can be used to estimate epidemiological variables that generally go  
182 unobserved.

### 183 **Phylodynamic inference for SARS-CoV-2 sequences from France**

184 We applied the segregating sites inference approach to a set of SARS-CoV-2 sequences sampled  
185 from France between January 23, 2020 and March 17, 2020, when a country-wide lockdown was  
186 implemented. We decided to apply our approach to this set of sequences for several reasons.  
187 First, a large fraction of the 479 available full-genome sequences from France over this time  
188 period appear to be genetically very similar to one another (Gámbaro et al. 2020), indicating that  
189 one major lineage may have taken off in France (or at least, that most samples stemmed from  
190 one major lineage). This lineage would be the focus of our analysis. Second, an in-depth analysis  
191 previously inferred  $R_0$  for France prior to the March 17 lock-down measures that were  
192 implemented (Salje et al. 2020). This analysis fit a compartmental infectious disease model to  
193 epidemiological data that included case, hospitalization, and death data. Because our  
194 phylodynamic inference approach can accommodate epidemiological model structures of  
195 arbitrary complexity, we can adopt the same model structure as in this previous analysis. We can



196 also set the epidemiological parameters that are assumed fixed in this previous analysis to their  
197 same values. By controlling for model structure and the set of model parameters assumed as  
198 given, we can ask to what extent sequence data corroborate the  $R_0$  estimates arrived at from  
199 detailed fits to epidemiological data.

200 To apply our segregating sites approach to the viral sequences from France, we first identified  
201 the subset of the 479 sequences that constituted a single, large lineage. To keep with the “tree-  
202 free” emphasis of our approach, we identified this subset of  $n = 432$  sequences without inferring  
203 a phylogeny (Materials and Methods). Using phylogenetic inference, however, we confirmed that  
204 our subset of sequences constituted a single evolutionary lineage (Figure S1). We calculated the  
205 nucleotide distance from each sequence in this subset to Wuhan/Hu-1 (Wu et al. 2020)  
206 (EPI\_ISL\_402125), a commonly used reference SARS-CoV-2 sequence that stemmed from a  
207 sample collected in Wuhan, China in late December 2019. Using these nucleotide distances, we  
208 estimated an evolutionary rate of  $8.21 \times 10^{-4}$  substitutions/site/yr (Figure 5A), consistent with the  
209 range of inferred evolutionary rate estimates for SARS-CoV-2 (Duchene et al. 2020; Pekar et al.  
210 2020). This provides another confirmation that this subset of sequences is a single evolutionary  
211 lineage brought into France early on during the pandemic.

212 To generate a segregating site trajectory from these sequences, we established consecutive, non-  
213 overlapping 4-day time windows such that the last time window ended on March 17, 2020. Figure  
214 5B shows the number of sequences falling into each time window. Figure 5C shows the  
215 segregating site trajectory calculated from these sequences. We jointly estimated  $R_0$  and  $t_0$  using  
216 this segregating site trajectory, under the assumption that the most infectious 15% of SARS-CoV-  
217 2 infected individuals are responsible for 80% of secondary infections, based on literature  
218 estimates of the extent of SARS-CoV-2 transmission heterogeneity (Sun et al. 2021) (Materials  
219 and Methods). We parameterized the model with a per genome, per transmission mutation rate  
220 of  $\mu = 0.33$  using consensus sequence data from established SARS-CoV-2 transmission pairs that  
221 were available in the literature (James et al. 2020; Popa et al. 2020; Braun et al. 2021; Lythgoe et  
222 al. 2021) (Materials and Methods). Specifically, for each of the 87 transmission pairs we had  
223 access to, we calculated the nucleotide distance between the consensus sequence of the donor  
224 sample and that of the recipient sample and fit a Poisson distribution to these data (Figure 5D).

225 Using this approach, we estimated a  $\mu$  value of 0.33 (95% confidence interval of 0.22 to 0.48),  
226 corresponding approximately to one mutation occurring every 3 transmission events.

227 Similar to the approach we undertook with our simulated data to jointly estimate  $R_0$  and  $t_0$ , we  
228 first considered a broad parameter space over which to calculate log-likelihood values.  
229 Specifically, we considered  $R_0$  values between 1.2 and 3.4 (at intervals of 0.1) and  $t_0$  values  
230 between December 2, 2019 and February 16, 2020 (at intervals of 2 days). We ran 10 SMC  
231 simulations and calculated the mean log-likelihood for each parameter combination (Figure 6A).  
232 Similar to our findings on the simulated data set, we found evidence for a log-likelihood ridge  
233 between early  $t_0$ /low  $R_0$  and late  $t_0$ /high  $R_0$  parameter combinations. Profile log-likelihoods for  
234  $R_0$  and  $t_0$  are shown in Figures 5B and 5C, respectively, yielding an estimate of  $R_0 = 2.22$  (95%  
235 confidence interval = 1.5 to 2.94) and an estimate of  $t_0 =$  January 11 (95% confidence interval =  
236 December 26, 2019 to January 28, 2020). Our maximum likelihood estimate of  $R_0$  is somewhat  
237 lower than the  $R_0$  estimate arrived at through the epidemiological time series analysis that  
238 presented the epidemiological model structure we adopted (Salje et al. 2020). That analysis  
239 inferred an  $R_0$  of 2.9 (95% confidence interval = 2.81 to 3.01) in France over this same time period.  
240 However, the confidence intervals of our analyses are relatively broad for  $R_0$ , and their estimate  
241 of  $R_0 = 2.9$  falls within our 95% confidence interval. Our estimate is closer in line with estimates  
242 of the reproduction number in Wuhan prior to travel restrictions being introduced ( $R_0 = 2.35$ ,  
243 with 95% CI of 1.15-4.77) (Kucharski et al. 2020) and with those estimated for Western European  
244 countries using incidence data up through March 17, 2020 ( $R_0 = 2.2$ , with 95% CI of 1.9-2.6)  
245 (Locatelli et al. 2021). Our estimate also aligns more closely with projections of  $R_0$  made  
246 specifically for France, using outbreak data from Wuhan (Hilton and Keeling 2020):  $R_0 = 2.2$  and  
247  $R_0 = 2.7$ , under different assumptions related to age-dependent susceptibility and infectiousness.  
248 Finally, our  $R_0$  estimates can be juxtaposed against results from phylodynamic analyses that used  
249 a birth-death model to infer  $R_0$  during three distinct epochs in France using a similar set of  
250 sequence data we analyze here (Danesh et al. 2020). Their second epoch spanned February 19  
251 through March 7, and the  $R_0$  inferred for this time period was 2.56 (95% credible interval = 1.66  
252 to 4.74). Our maximum likelihood estimate of  $t_0$  in the middle of January 2020 aligns well with  
253 findings from Gámbaro et al. ( 2020) and is further consistent with the estimate from Salje et al.

254 (2020) that 58.65 (95% CI 37.85 – 88.37) individuals were present in the exposed ( $E_1$  class) on  
255 January 22, 2020 based on fitting the epidemiological model to epidemiological data.

256 As we had done in our analysis of the simulated data set, we reconstructed the unobserved state  
257 variables using sampled particles from SMC simulations parameterized with  $R_0$  and  $t_0$  values that  
258 were sampled from the parameter space shown in Figure 6, weighted according to the log-  
259 likelihood values of the parameter combination. Plotting of reconstructed segregating site  
260 trajectories indicated a very good fit to the observed segregating site trajectory (Figure 7A). The  
261 number of individuals in the  $E_1$ ,  $E_2$ , and  $I$  classes increased exponentially over the time period  
262 considered (Figure 7B), as expected for an epidemic with an  $R_0 > 1$ . In Figure 7C, we plot the  
263 reconstructed cumulative number of exposed individuals over time and the reconstructed  
264 cumulative number of recovered individuals over time. These cumulative dynamics indicate that  
265 by mid-March 0.004% to 0.069% of the population in France had become infected by this SARS-  
266 CoV-2 lineage and that 0.001% to 0.017% of the population in France had recovered from  
267 infection from this SARS-CoV-2 lineage. Depending on when seroconversion is assumed to occur,  
268 these cumulative predictions can be compared against findings from a serological study that was  
269 conducted over this time period in France (Le Vu et al. 2021). This study surveyed 3221 individuals,  
270 finding that 0.41% of individuals (95% confidence interval = 0.05 to 0.88) had gotten infected  
271 with SARS-CoV-2 by March 9 to 15, 2020. While these estimates fall slightly higher than our  
272 predictions, we are considering only one SARS-CoV-2 lineage (albeit likely the dominant one  
273 circulating during this time period), and would thus expect the cumulative positive proportion  
274 we predict to be lower than overall (all lineage) serology estimates. Other reasons for possible  
275 underestimation involve epidemiological model misspecification and inaccurate  
276 parameterization, for example, of the extent of transmission heterogeneity  $p_h$ .

## 277 **Discussion**

278 Here, we developed a phylodynamic inference approach to estimate epidemiological parameters  
279 from virus sequence data. Our inference approach is a “tree-free” approach in that it does not  
280 rely on the reconstruction of viral phylogenies to estimate model parameters. One benefit of  
281 using a “tree-free” approach for parameter estimation of emerging viral pathogens is that, early

282 on in an epidemic or pandemic, phylogenetic uncertainty is significant, and tree-based  
283 phylodynamic inference approaches would need to integrate over this uncertainty, which is often  
284 times computationally intensive. A second benefit of using a “tree-free” approach is that  
285 parameters of the model of sequence evolution do not need to be estimated, reducing degrees  
286 of freedom considerably. Instead of viral phylogenies being the data that statistically interface  
287 with the epidemiological models, we use a low-dimensional summary statistic of the sequence  
288 data, namely the number of segregating sites present in temporally-adjacent sets of viral  
289 sequences. Beyond being a “tree-free” approach, our inference approach also benefits from  
290 being “plug-and-play” in that it can easily accommodate any arbitrarily complex (or simple)  
291 epidemiological model structure.

292 Based on fits to a simulated data set, we have shown that segregating site trajectories are highly  
293 informative of epidemiological parameters such as  $R_0$  and the timing of the index case  $t_0$ . As far  
294 as we are aware, only one other peer-reviewed tree-free phylodynamic inference method exists  
295 (Kim et al. 2017), and future work should compare the approach developed here against this and  
296 potentially other phylodynamic inferences approaches.

297 Although there are clear benefits of the phylodynamic inference approach detailed here, it still  
298 relies on several assumptions that are also shared by other phylodynamic inference methods.  
299 Most notably, it relies on an assumption of random sampling of individuals. However, in contrast  
300 to coalescent-based models, the sampling rate does not have to be small relative to the number  
301 of infected individuals. Phylodynamic inference based on birth-death-sampling models instead  
302 requires the specification of a sampling process, such as a constant probability of an infected  
303 individual being sampled upon recovery/death (Stadler 2010). Misspecification of the sampling  
304 process can severely bias results, and much of the statistical power gained from these  
305 approaches appears to arise from the sequence of sample times rather than genealogical  
306 structure (Volz and Frost 2014). While our approach similarly requires an assumption of when  
307 individuals are sampled, our approach provides considerable flexibility in what assumptions are  
308 adopted, since the process model component of the state-space model can be easily  
309 implemented under any number of assumptions of when individuals are available for sampling.  
310 For example, in the compartmental model we used in the analysis of the France sequence data,

311 we could in principle assume that individuals could be sampled once they became infected during  
312 a time window, rather than if they recovered during the time window.

313 The analysis we presented here focuses on phylodynamic inference using sequence data alone.  
314 In recent years, there has also been a growing interest in combining multiple data sources – for  
315 example, sequence data and epidemiological data or serological data - to more effectively  
316 estimate model parameters. The few studies that have managed to incorporate additional data  
317 while performing phylodynamic inference have shown the value in pursuing this goal (Rasmussen  
318 et al. 2011; Li et al. 2017). As a next step, we aim to extend the segregating sites approach  
319 developed here to incorporate epidemiological data and/or serological data more explicitly.  
320 Straightforward extension is possible due to the state-space model structure that is at the core  
321 of the particle filtering routine we use. While the process model would stay the same, another  
322 observation model can be added that relates the underlying state variables (e.g.,  $S$ ,  $E$ ,  $I$ ,  $R$ ) to  
323 observed case data for instance. This proposed approach mirrors a previously described  
324 approach (Rasmussen et al. 2011), which showed that combining multiple data sources improved  
325 parameter estimation.

326 Our analysis focused on phylodynamic inference based on sequence data belonging to a single  
327 viral lineage, with a single index case. Our approach however can be expanded in a  
328 straightforward manner to multiple viral lineages, each with their own index case. This is  
329 especially useful in cases like SARS-CoV-2, where many regions have witnessed multiple clade  
330 introductions in fueling the start of more local epidemics (Gonzalez-Reiche et al. 2020; Miller et  
331 al. 2020). In this case, under the assumption that all lineages are phenotypically neutral and are  
332 expanding in subpopulations experiencing the same epidemiological parameters (e.g.,  $R_0$ ), the  
333 inference code can be expanded to estimate a single set of epidemiological parameters along  
334 with multiple index case times, one corresponding to each viral lineage. When considering  
335 multiple clades, a single segregating sites trajectory would be calculated for each clade, such that  
336 multiple segregating site trajectories could be fit to at the same time.

337 Our approach can also be extended in a straightforward manner to consider multiple clades that  
338 may be subject to different parameterizations for either intrinsic or extrinsic reasons. For

339 example, clades circulating in the same region may expand at different rates due to genetic  
340 differences between the clades that confer a selective advantage of one clade over others. In this  
341 case, multiple segregating site trajectories could again be calculated – one for each clade – and  
342 phylodynamic inference would involve estimating epidemiological parameters, some of which  
343 may be assumed to be similar across clades, while others such as  $R_0$  may differ between clades.  
344 As such, this inference method, which we initially developed for emerging pathogens with low  
345 levels of genetic diversity, may continue to be useful for endemic pathogens when questions  
346 involving emerging clades are a focus. Future work thus needs to determine when tree-free  
347 phylodynamic inference provides advantages over tree-based phylodynamic inference, and  
348 when tree-based methods provide better resolution into the dynamics of circulating virus  
349 populations.

## 350 **Materials and Methods**

351 **Epidemiological model simulations and calculation of segregating site trajectories.** We consider  
352 epidemiological models of arbitrary complexity that incorporate demographic stochasticity using  
353 Gillespie's  $\tau$ -leap algorithm. As a concrete example of such an epidemiological model, we here  
354 use a susceptible-exposed-infected-recovered (SEIR) model whose dynamics are governed by the  
355 following equations:

$$356 \quad S_{t+\Delta t} = S_t - N_{S \rightarrow E}$$

$$357 \quad E_{t+\Delta t} = E_t + N_{S \rightarrow E} - N_{E \rightarrow I}$$

$$358 \quad I_{t+\Delta t} = I_t + N_{E \rightarrow I} - N_{I \rightarrow R}$$

$$359 \quad R_{t+\Delta t} = R_t + N_{I \rightarrow R}$$

360 where:

$$361 \quad N_{S \rightarrow E} \sim \text{Pois}\left(\beta \frac{S_t}{N} I_t \Delta t\right)$$

$$362 \quad N_{E \rightarrow I} \sim \text{Pois}(\gamma_E E_t \Delta t)$$

$$363 \quad N_{I \rightarrow R} \sim \text{Pois}(\gamma_I I_t \Delta t)$$

364 Here,  $\beta$  is the transmission rate,  $N$  is the host population size,  $\gamma_E$  is the rate of transitioning from  
365 the exposed to the infected class,  $\gamma_I$  is the rate of recovering from infection, and  $\Delta t$  is the  $\tau$ -leap  
366 time step used.  $R_0$  is given by  $\beta / \gamma_I$ . While the epidemiological dynamics of this model can be  
367 simulated from the above equations alone, additional complexity is needed to incorporate virus  
368 evolution throughout the time period of the simulation. To incorporate virus evolution, we  
369 subcategorize both exposed individuals and infected individuals into genotype classes, with  
370 genotype 1 being the reference genotype present at the start of the simulation. Mutations to the  
371 virus occur at the time of transmission, with the number of mutations that occur in a single  
372 transmission event given by a Poisson random variable with mean  $\mu$ , the per genome per  
373 transmission event mutation rate. We assume infinite sites such that new mutations necessarily  
374 result in new genotypes. New genotypes are numbered chronologically according to their  
375 appearance. When new mutations are generated at a transmission event, the new genotype is  
376 assumed to harbor the same mutation(s) as its infecting genotype plus any new mutations, which  
377 are similarly numbered chronologically based on appearance. We use a sparse matrix approach  
378 to store genotypes and their associated mutations to save on memory.

379 Given this model, during a time step  $\Delta t$ ,  $N_{E \rightarrow I}$  individuals are drawn at random from the set of  
380 individuals who are currently exposed; these will be the individuals who will transition to the  
381 infected class during this time step. Similarly,  $N_{I \rightarrow R}$  individuals are drawn at random from the set  
382 of individuals who are currently infected; these will be the individuals who will transition to the  
383 recovered class during this time step. We further add  $N_{S \rightarrow E}$  new individuals to the set of exposed  
384 class during time step  $\Delta t$ . For each newly exposed individual, we randomly choose (with  
385 replacement) a currently infected individual as its 'parent'. If no mutations occur during  
386 transmission, then this new individual enters the same genotype class of its parent. If one or  
387 more mutations occur during transmission, then this new individual enters a new genotype class,  
388 and the sparse matrix is extended to document the new genotype and its associated mutations.

389 We start the simulation with one infected individual carrying a viral genotype that we consider  
390 as the 'reference' genotype (genotype 1). To calculate a time series of segregating sites, we  
391 define a time window length  $T$  ( $T > \Delta t$ ) of a certain number of days and partition the simulation

392 time course into discrete, non-overlapping time windows. During simulation, we keep track of  
393 the individuals that recover (transition from I to R) within a time window. For each time window  
394  $i$ , we then sample  $n_i$  of these individuals at random, where  $n_i$  is the number of sequences sampled  
395 in a given time window based on the sampling scheme chosen. Because we have the genotypes  
396 of the sampled individuals from the sparse matrix, we can calculate for any time window  $i$ , the  
397 number of segregating sites  $S_i$ .  $S_i$  is simply the number of polymorphic sites across the sampled  
398 individuals in time window  $i$ .

399 **Phylogenetic inference using time series of segregating sites.** Our phylogenetic inference  
400 approach relies on particle filtering, also known as Sequential Monte Carlo (SMC), to estimate  
401 model parameters and reconstruct latent state variables. The underlying forward model we use  
402 is formulated as a state-space model, with epidemiological variables (e.g.,  $S$ ,  $E$ ,  $I$ , and  $R$ ) being  
403 latent/unobserved variables in the process model. The model is simulated using Gillespie's  $\tau$ -leap  
404 algorithm, as described in the section above. The evolutionary component of the model also  
405 contributes to the process model. For the observation model, we perform  $k$  'grabs' of sampled  
406 individuals, with each 'grab' consisting of the following steps:

- 407 • pick (without replacement)  $n_i$  individuals from the set of individuals who recovered during  
408 time window  $i$ , where  $n_i$  is the number of samples observed in the empirical dataset in  
409 window  $i$ . We sample the same number of individuals as in the segregating sites dataset  
410 that the model interfaces with, since sampling effort impacts the number of segregating  
411 sites.
- 412 • calculate the simulated number of segregating sites  $S_i^{\text{sim}}$ , based on the genotypes of the  
413 sampled  $n_i$  individuals (and their associated mutations).

414 Between 'grabs', replacement of previously sampled individuals occurs. We then calculate the  
415 mean number of segregating sites for window  $i$  by taking the average of all  $k$   $S_i^{\text{sim}}$  values. Finally,  
416 we calculate the probability of observing  $S_i$  segregating sites in window  $i$ , given the model-  
417 simulated mean number of segregating sites, using a Poisson probability density function  
418 parameterized with the mean  $S_i^{\text{sim}}$  value and evaluated at  $S_i$ . We use a Poisson probability density  
419 function based on our observation that a Poisson distribution with the mean number of



420 segregating sites captures the distribution of  $S_i^{\text{sim}}$  values from the ‘grabs’ effectively (Figure S2).  
421 These probabilities serve as the weights for the particles. Particle weights are calculated at the  
422 end of each time window with  $n_i > 0$ . Particles are resampled at the end of each of these time  
423 windows according to their assigned weights. Particles with stochastic extinction of the virus prior  
424 to the end of the last time window with  $n_i > 0$  have weights set to 0 in time window  $i$ . If the  
425 number of sampled individuals  $n_i$  in time window  $i$  exceeds the total number of individuals who  
426 recovered in time window  $i$ , the particle weight is similarly set to 0. We run 10 SMC simulations  
427 for each parameter set considered, resulting in 10 log-likelihood values.

428 For maximum likelihood estimation, weighted quadratic fitting is used, which is adapted from  
429 Ionides et al. (2017). First, we use local quadratic smoothing (*LOESS*) with a span of 0.75 to obtain  
430 the peak of the log-likelihood surface. The weight of each data point is determined by the  
431 distance between this peak, using the tri-cube weight function. After excluding data points with  
432 smaller weights by filtering out the smallest  $\lambda \times 100$  percent, a quadratic function is fitted to data  
433 points based on weights. For Figure 2C, the  $\lambda$  for the quadratic fit was set to 0.5. For Figure 3B,  
434 the  $\lambda$  was set to 0.75, and for Figure 3C, the  $\lambda$  was set to 0.55. Latent state variables are  
435 reconstructed by randomly sampling a particle’s  $x_{0:t_{\text{end}}}$  at the end of an SMC simulation, where  
436  $t_{\text{end}}$  is the date at which the last sampled time window ends. All of our SMC simulations were  
437 performed with 200 particles. We used  $k = 100$  ‘grabs’ for the simulated data and, in the interest  
438 of time,  $k = 50$  ‘grabs’ for the France data.

439 Note that the complexity of this phylodynamic method is largely independent of the number of  
440 input sequences, in contrast to phylodynamic inference approaches that rely on integrating over  
441 phylogenetic uncertainty with BEAST.

442 **Implementation of the transmission heterogeneity model.** We implement transmission  
443 heterogeneity by subcompartmentalizing the infected classes into a high-transmission and a low-  
444 transmission class, as has been done elsewhere (Volz and Siveroni 2018; Miller et al. 2020). For  
445 an SEIR model, the model extended to incorporate transmission heterogeneity becomes:

446 
$$S_{t+\Delta t} = S_t - N_{S \rightarrow E}$$

$$447 \quad E_{t+\Delta t} = E_t + N_{S \rightarrow E} - N_{E \rightarrow I_h} - N_{E \rightarrow I_l}$$

$$448 \quad I_{h,t+\Delta t} = I_{h,t} + N_{E \rightarrow I_h} - N_{I_h \rightarrow R}$$

$$449 \quad I_{l,t+\Delta t} = I_{l,t} + N_{E \rightarrow I_l} - N_{I_l \rightarrow R}$$

$$450 \quad R_{t+\Delta t} = R_t + N_{I_h \rightarrow R} + N_{I_l \rightarrow R}$$

451 where:

$$452 \quad N_{S \rightarrow E} \sim \text{Pois}(\beta_h \frac{S_t}{N} I_{h,t} \Delta t) + \text{Pois}(\beta_l \frac{S_t}{N} I_{l,t} \Delta t)$$

$$453 \quad N_{E \rightarrow I} \sim \text{Pois}(\gamma_E E_t \Delta t)$$

$$454 \quad N_{E \rightarrow I_h} \sim \text{Bin}(N_{E \rightarrow I}, p_h)$$

$$455 \quad N_{E \rightarrow I_l} = N_{E \rightarrow I} - N_{E \rightarrow I_h}$$

$$456 \quad N_{I_h \rightarrow R} \sim \text{Pois}(\gamma_I I_{h,t} \Delta t)$$

$$457 \quad N_{I_l \rightarrow R} \sim \text{Pois}(\gamma_I I_{l,t} \Delta t)$$

458 The parameter  $p_h$  quantifies the proportion of exposed individuals who transition to the highly  
 459 infectious  $I_h$  class. Parameters  $\beta_h$  and  $\beta_l$  quantify the transmission rates of the infectious classes  
 460 that have high and low transmissibility, respectively. We set the values of  $\beta_h$  and  $\beta_l$  based on a  
 461 given parameterization of overall  $R_0$  and the parameter  $p_h$ . To do this, we first define, as in  
 462 previous work (Volz and Siveroni 2018; Miller et al. 2020), the relative transmissibility of infected

463 individuals in the  $I_h$  and  $I_l$  classes as  $c = \frac{\beta_h}{\beta_l}$ . We further define a parameter  $P$  as the fraction of  
 464 secondary infections that resulted from a fraction  $p_h$  of the most transmissible infected  
 465 individuals. Based on given values of  $p_h$  and  $P$ , we set  $c$ , as in previous work (Miller et al. 2020),

466 to  $\frac{\frac{1-p_h}{p_h}}{\frac{1}{P}-1}$ . With  $c$  defined in this way,  $p_h$  is interpreted as the proportion of most infectious

467 individuals that result in  $P = 80\%$  of secondary infections. Recognizing that  $R_0 = \frac{p_h \beta_h + (1-p_h) \beta_l}{\gamma_I}$  in

468 this model, we can then solve for  $\beta_h$ :  $\frac{R_0 \gamma_I}{p_h c + (1-p_h)}$ , and set  $\beta_h = c \beta_l$ .

469 **Epidemiological model structure and parameterization used for the France analysis.**

470 The process model we use in our phylodynamic inference of the France sequence data is based  
471 on a previously published epidemiological model for SARS-COV-2 in France (Salje et al. 2020). We  
472 base our process model on this published model to allow for a direct comparison of inferred  $R_0$   
473 values between our sequence-based analysis and their analysis that focuses over a similar time  
474 period. Their analysis was based on fitting an epidemiological model to a combination of case,  
475 hospitalization, and death data. Their model structure, implemented using Gillespie's  $\tau$ -leap  
476 algorithm, is given by:

477 
$$S_{t+\Delta t} = S_t - N_{S \rightarrow E1}$$

478 
$$E_{1,t+\Delta t} = E_{1,t} + N_{S \rightarrow E1} - N_{E1 \rightarrow E2}$$

479 
$$E_{2,t+\Delta t} = E_{2,t} + N_{E1 \rightarrow E2} - N_{E2 \rightarrow I}$$

480 
$$I_{t+\Delta t} = I_t + N_{E2 \rightarrow I} - N_{I \rightarrow R}$$

481 
$$R_{t+\Delta t} = R_t + N_{I \rightarrow R}$$

482 where:

483 
$$N_{S \rightarrow E1} \sim Pois(\beta \frac{S_t}{N} I_t \Delta t) + Pois(\beta \frac{S_t}{N} E_{2,t} \Delta t)$$

484 
$$N_{E1 \rightarrow E2} \sim Pois(\gamma_{E1} E_{1,t} \Delta t)$$

485 
$$N_{E2 \rightarrow I} \sim Pois(\gamma_{E2} E_{2,t} \Delta t)$$

486 
$$N_{I \rightarrow R} \sim Pois(\gamma_I I_t \Delta t)$$

487 with  $\beta$  being the transmission rate, the average duration of time spent in the  $E_1$  class given by  
488  $1/\gamma_{E1} = 4$  days, the average duration of time spent in the  $E_2$  class given by  $1/\gamma_{E2} = 1$  day, and the  
489 average duration of time spent in the infected class given by  $1/\gamma_I = 3$  days. While exposed class  
490 2 ( $E_2$ ) and infected class  $I$  both transmit as efficiently, their model contains this level of detail to  
491 more effectively interface with the case data, where symptoms do not appear before an  
492 individual is infected (in class  $I$ ). We keep with this model, rather than reducing it to having only

493 a single exposed class and a single infectious class to keep the same distribution of infected times  
494 as in their model.

495 Because SARS-CoV-2 dynamics are characterized by substantial levels of transmission  
496 heterogeneity (Adam et al. 2020; Miller et al. 2020; Sun et al. 2021) and we have shown in Figure  
497 1 that transmission heterogeneity impacts segregating site trajectories, we expanded the  
498 compartmental epidemiological model described above to include transmission heterogeneity in  
499 a manner similar to the one we used in Figures 1E, F. Based specifically on the analysis by Sun  
500 and coauthors (Sun et al. 2021), we set  $p_h$  to 0.15, such that 15% of infections are responsible for  
501 80% of secondary infections.

### 502 **Estimation of the per genome, per transmission event mutation rate**

503 We set the per-genome, per-transmission mutation rate parameter  $\mu$  to 0.33. This is based on  
504 the fit of a Poisson distribution to the number of *de novo* substitutions between 87 transmission  
505 pairs of SARS-CoV-2 from four studies (James et al. 2020; Popa et al. 2020; Braun et al. 2021;  
506 Lythgoe et al. 2021). Accession numbers for 78/87 of these transmission pairs are available in  
507 Table S1. Accession numbers for the remaining pairs were provided by the corresponding authors  
508 of the relevant publication (Lythgoe et al. 2021) Sequence data were aligned to Wuhan/Hu-1  
509 (MN908947.3) (Wu et al. 2020) using MAFFT v.7.464 (Katoh 2002). Insertions relative to  
510 Wuhan/Hu-1 were removed and the first 55 and last 100 nucleotides of the genome were masked.  
511 *De Novo* substitutions for each pair were identified in Python v.3.9.4 (<http://www.python.org>)  
512 using NumPy v.1.19.4 (Harris et al. 2020). Ambiguous nucleotides were considered in the  
513 identification of *de novo* substitutions (i.e. an R nucleotide was assumed to match both an A and  
514 a G). The mean number of substitutions between transmission pairs is the Maximum Likelihood  
515 Estimate for the  $\lambda$  parameter of the Poisson distribution. The 95% confidence intervals were  
516 calculated using the exact method using SciPy v.1.5.4 (SciPy 1.0 Contributors et al. 2020) such  
517 that the lower bound was  $\frac{(X_{2Y,0.025}^2)/2}{87}$  and the upper bound was  $\frac{(X_{2(Y+1),0.975}^2)/2}{87}$  where Y is the total  
518 number of observed substitutions.

519 The value for  $\mu = 0.33$  is consistent with population-level substitution rate estimates for SARS-  
520 CoV-2, which range from  $7.9 \times 10^{-4}$  to  $1.1 \times 10^{-3}$  substitutions per site per year (Duchene et al.  
521 2020; Pekar et al. 2020). With a genome length of SARS-CoV-2 of approximately 30,000  
522 nucleotides and a generation interval of approximately 4.5 days (Griffin et al. 2020), these  
523 population-level substitution rates would correspond to per genome, per transmission mutation  
524 rates of between 0.29 and 0.41, respectively.

### 525 **Estimation of segregating site trajectories for the France data.**

526 We downloaded all complete and high-coverage SARS-CoV-2 sequences with complete sampling  
527 dates sampled through March 17<sup>th</sup>, 2020 ([https://www.france24.com/en/20200316-live-france-](https://www.france24.com/en/20200316-live-france-s-macron-addresses-nation-amid-worsening-coronavirus-outbreak)  
528 [s-macron-addresses-nation-amid-worsening-coronavirus-outbreak](https://www.france24.com/en/20200316-live-france-s-macron-addresses-nation-amid-worsening-coronavirus-outbreak)) in France and uploaded  
529 through April 29<sup>th</sup>, 2021 from GISAID (Shu and McCauley 2017). Sequences were aligned to  
530 Wuhan/Hu-1 using MAFFT v.7.464. Insertions relative to Wuhan/Hu-1 were removed. Any  
531 sequences with fewer than 28000 A, C, T, or G characters were removed. Following this filtering  
532 protocol our dataset included 479 sequences. We masked the first 55 and last 100 nucleotides in  
533 the genome as well as positions marked as “highly homoplastic” in early SARS-CoV-2 sequencing  
534 data ([https://github.com/W-L/ProblematicSites\\_SARS-CoV2/blob/master/archived\\_vcf/](https://github.com/W-L/ProblematicSites_SARS-CoV2/blob/master/archived_vcf/problematic_sites_sarsCov2.2020-05-27.vcf)  
535 [problematic\\_sites\\_sarsCov2.2020-05-27.vcf](https://github.com/W-L/ProblematicSites_SARS-CoV2/blob/master/archived_vcf/problematic_sites_sarsCov2.2020-05-27.vcf)). Pairwise SNP distances were calculated in a  
536 manner that accounted for IUPAC ambiguous nucleotides in Python using NumPy. To subset  
537 these data to a single clade circulating within France, we identified the connected components  
538 of this pairwise distance matrix with a cutoff of 1 SNP in Python using SciPy and identified the  
539 shared SNPs relative to Wuhan/Hu-1 between all sequences in each connected component. The  
540 largest connected component contained 308 sequences which shared the substitutions C241T,  
541 C3037T, C14408T, and A23403G. Our final dataset included these 308 as well as 122 sequences  
542 from connected components that shared these four substitutions relative to Wuhan/Hu-1. We  
543 included connected components in which all sequences had an N at any of the four clade-defining  
544 sites of the largest connected component. Two sequences were excluded as they differed from  
545 all other sequences in the dataset by  $> 7$  SNPs. This dataset is similar to the set of sequences  
546 analyzed in Danesh et al. (2020). Sequences were binned into four-day windows, aligned such  
547 that the last window ended on the latest sampling date, and the number of segregating sites in

548 each window calculated in Python using NumPy. Ambiguous nucleotides were considered in the  
549 calculation of segregating sites.

### 550 **Phylogenetic analysis of SARS-CoV-2 sequences from France.**

551 To confirm that the subset of sequences from France obtained from finding connected  
552 components formed an evolutionary lineage/clade, we first combined the 479 sequences  
553 sampled from France with 100 randomly-selected complete, high-coverage, collected date  
554 complete sequences sampled from outside France through March 17<sup>th</sup>, 2020 and uploaded to  
555 GISAID through April 29<sup>th</sup>, 2021. These sequences were aligned to Wuhan/Hu-1 using MAFFT,  
556 insertions were removed, and the sites described above were masked. This alignment was  
557 concatenated with the aligned sequences from France. IQ-Tree v. 2.0.7 (Minh et al. 2020) was  
558 used to construct a maximum likelihood phylogeny, and ModelFinder (Kalyaanamoorthy et al.  
559 2017) was used to find the best fit nucleotide substitution model (GTR+F+I). Small branches were  
560 collapsed. TreeTime v. 0.8.0 (Sagulenko et al. 2017) was used to remove any sequences with  
561 more than four interquartile distances from the expected evolutionary rate, rooting at  
562 Wuhan/Hu-1. Treetime was also used to generate a time-aligned phylogeny assuming a clock rate  
563 of  $1 \times 10^{-3}$  with a standard deviation of  $5 \times 10^{-4}$ , a skyline coalescent model, marginal time  
564 reconstruction, accounting for covariation, and resolving polytomies.

565 Maximum likelihood phylogenies were visualized in Python using Matplotlib v. 3.3.3 (Hunter  
566 2007) and Baltic (<https://github.com/evogytis/baltic>).

### 567 **Availability of code.**

568 Python code used for generation of all figures is available on GitHub:  
569 <https://github.com/koellelab/segregating-sites>

570

571 **FIGURES**

572

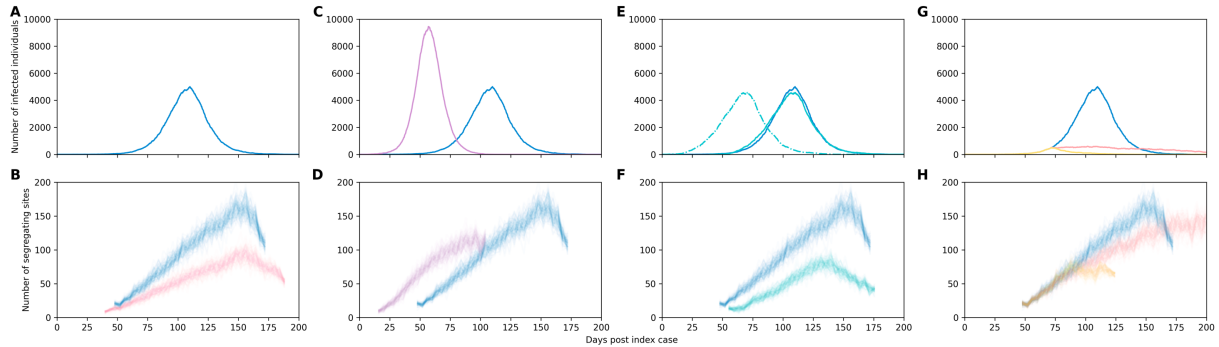

573

574 **Figure 1. Segregating site trajectories under simulated epidemiological dynamics.** (A) Simulated  
575 dynamics of infected individuals ( $I$ ) under an SEIR model simulated with an  $R_0$  of 1.6. (B) Segregating site  
576 trajectories under dense and sparse sampling. Dense sampling (blue lines) corresponds to 40 sequences  
577 sampled per time window. Sparse sampling (red lines) corresponds to 20 sequences sampled per time  
578 window. (C) Simulated dynamics of infected individuals ( $I$ ) under an SEIR model simulated with an  $R_0$  of  
579 2.0 (purple line) compared to those of the  $R_0 = 1.6$  simulation (blue line). A higher transmission rate was  
580 used to generate the higher  $R_0$  value of 2.0. (D) Segregating site trajectories for the  $R_0 = 2.0$  simulation  
581 (purple lines) and the  $R_0 = 1.6$  simulation (blue lines). Both simulations are densely sampled (40 sequences  
582 sampled per time window). (E) Simulated dynamics of infected individuals ( $I$ ) under an SEIR model with  
583 an  $R_0$  of 1.6 and incorporating transmission heterogeneity (teal, dashed line) compared to those of the  
584 original  $R_0 = 1.6$  simulation (blue line) without transmission heterogeneity. Transmission heterogeneity  
585 was included by setting  $p_h = 0.06$ , resulting in 6% of the most infectious individuals being responsible for  
586 80% of secondary infections. For ease of comparing segregating site trajectories, the transmission  
587 heterogeneity simulation was shifted later in time such that its epidemic peak aligned with the simulation  
588 without transmission heterogeneity (teal, solid line). (F) Segregating site trajectories for the shifted  
589 transmission heterogeneity simulation (teal lines) and the simulation without transmission heterogeneity  
590 (blue line). Both simulations are densely sampled (40 sequences sampled per time window). (G) Simulated  
591 dynamics of infected individuals ( $I$ ) under an SEIR model simulated with changing  $R_0$ . Changes in  $R_0$   
592 occurred when the number of infected individuals reached 400. The simulation in red has  $R_0$  decreasing  
593 to 1.1. The simulation in yellow has  $R_0$  decreasing to 0.75. The simulation in blue has  $R_0$  remaining at 1.6.  
594 (H) Segregating site trajectories for the three simulations shown in Figure 1G. All three simulations are

595 densely sampled (40 sequences sampled per time window). In all model simulations,  $\gamma_E = 1/2 \text{ days}^{-1}$ ,  
596  $\gamma_I = 1/3 \text{ days}^{-1}$ , population size  $N = 10^5$ , and the per genome, per transmission mutation rate  $\mu = 0.2$ .  
597 Initial conditions are  $S(t_0) = N-1$ ,  $E(t_0) = 0$ ,  $I(t_0) = 1$ , and  $R(t_0) = 0$ . For the transmission heterogeneity  
598 simulation (subplot E), initial conditions are  $S(t_0) = N-1$ ,  $E(t_0) = 0$ ,  $I_h(t_0) = 1$ ,  $I_l(t_0) = 0$ , and  $R(t_0) = 0$ . A time  
599 step of  $\tau = 0.1$  days was used in the Gillespie  $\tau$ -leap algorithm. Time windows of  $T = 4$  days were used to  
600 bin sequences for the segregating sites calculation. 100 different segregating site trajectories are shown  
601 for each simulation.

602

603



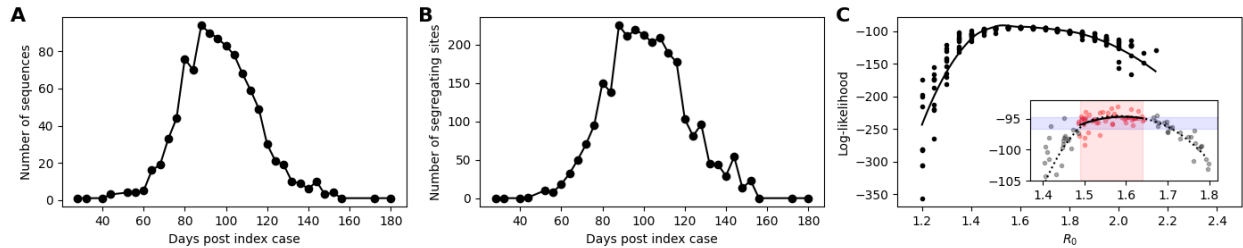

604

605 **Figure 2. Phylodynamic inference on a simulated trajectory of segregating sites.** (A) The number of  
606 sampled sequences over time, by time window. Sampling was done in proportion to the number of  
607 individuals recovering in a time window. In all, 1000 sequences were sampled over the course of the  
608 simulated epidemic. The number of samples in a given time window was constrained to be  $\leq 100$ . (B)  
609 Simulated segregating site trajectory from the sampled sequences. (C) Estimation of  $R_0$  using SMC. Points  
610 show log-likelihood values from different SMC simulations across a range of  $R_0$  values between 1.2 and  
611 2.5, in 0.05 increments. Smoothed likelihood surface was obtained by *LOESS* smoothing with a span of  
612 0.75. Inset: Maximum likelihood estimation of  $R_0$  using quadratic fitting. Black points in inset show log-  
613 likelihood values from different SMC simulations across a range of  $R_0$  values between 1.4 and 1.8. The  
614 vertical black dashed line shows the maximum likelihood estimate (MLE) of  $R_0$  (1.59). The red band shows  
615 the 95% confidence interval of  $R_0$  (1.49 – 1.64). MLE and 95% CI were obtained from fitting a quadratic  
616 function to the log-likelihood values shown in the inset, using a similar approach to the one outlined in  
617 Ionides et al. (2017) with a  $\lambda$  value of 0.5. 95% CI were set at the values of  $R_0$  corresponding to the  
618 maximum likelihood value at the peak of the quadratic curve minus 1.92 log-likelihood units. Model  
619 parameters for the simulated data set are:  $R_0 = 1.6$ ,  $\gamma_E = 1/2 \text{ days}^{-1}$ ,  $\gamma_I = 1/3 \text{ days}^{-1}$ , population size  $N =$   
620  $10^5$ ,  $t_0 = 0$ , and the per genome, per transmission mutation rate  $\mu = 0.2$ . Initial conditions are  $S(t_0) = N-1$ ,  
621  $E(t_0) = 0$ ,  $I(t_0) = 1$ , and  $R(t_0) = 0$ . A time step of  $\tau = 0.1$  days was used in the Gillespie  $\tau$ -leap algorithm. A  
622 time window of  $T = 4$  days was used to bin sequences for the segregating sites calculation.

623

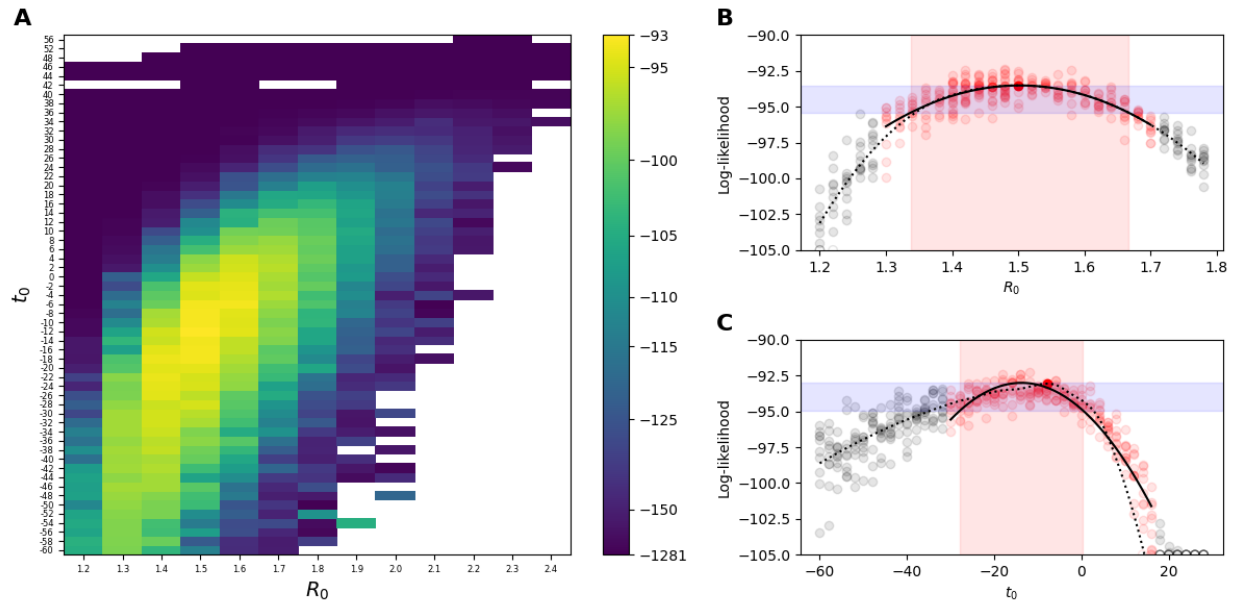

624

625 **Figure 3. Joint estimation of the basic reproduction number ( $R_0$ ) and the timing of the index case ( $t_0$ )**

626 **using simulated data.** (A) The likelihood surface based on the segregating site trajectory shown in Figure  
627 2B is shown over a broad range of  $R_0$  values (1.2 to 2.4, in 0.1 increments) and  $t_0$  values (from 60 days  
628 prior to 56 days following the true  $t_0$  of 0 in 2-day increments). Blank cells yielded log-likelihood values of  
629  $< -1281$ . Log-likelihood values shown in each cell across this broad range of  $R_0$  and  $t_0$  are mean log-  
630 likelihood values calculated from 10 SMC simulations at each parameterization. (B-C) Profile likelihood for  
631  $R_0$  (B) and  $t_0$  (C). Profile likelihoods were calculated using an approach similar to the one outlined in Ionides  
632 et al. (2017). The LOESS fit is shown with a dotted black line. The quadratic fit is shown with a solid black  
633 line. Points included in the quadratic fit are shown in red; points excluded from the quadratic fit are shown  
634 in gray. The shaded red area is the 95% confidence interval for the focal parameter. The shaded blue area  
635 shows the range of log-likelihood values that fall within 1.92 log-likelihood values of the quadratic fit's  
636 maximum value.

637

638

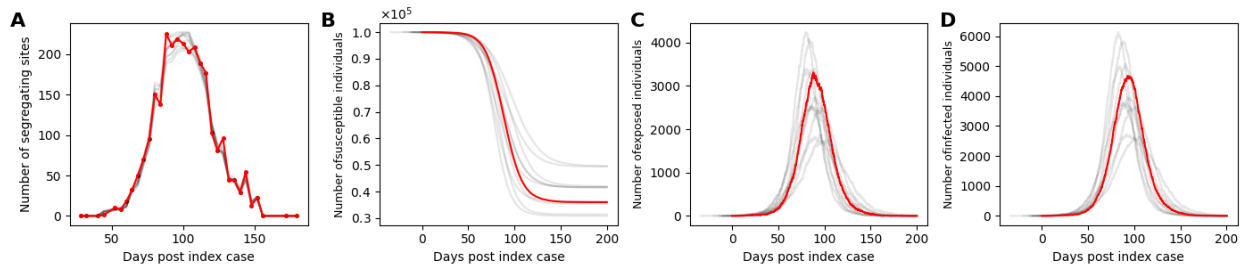

639

640 **Figure 4. Trajectories of reconstructed unobserved state variables for the simulated dataset. (A)**

641 Simulated trajectory of the number of segregating sites (red), alongside reconstructed trajectory of the

642 number of segregating sites from 10 sampled SMC particles (gray). For each SMC particle, a combination

643 of  $t_0$  and  $R_0$  values of 10 SMC iterations were randomly chosen based on their log-likelihood values. (B)

644 Simulated dynamics of susceptible individuals (red), alongside reconstructed dynamics of susceptible

645 individuals from these SMC simulations (gray). (E) Simulated dynamics of exposed individuals (red),

646 alongside reconstructed dynamics of exposed individuals (gray). (F) Simulated dynamics of infected

647 individuals (red), alongside reconstructed dynamics of infected individuals (gray).

648

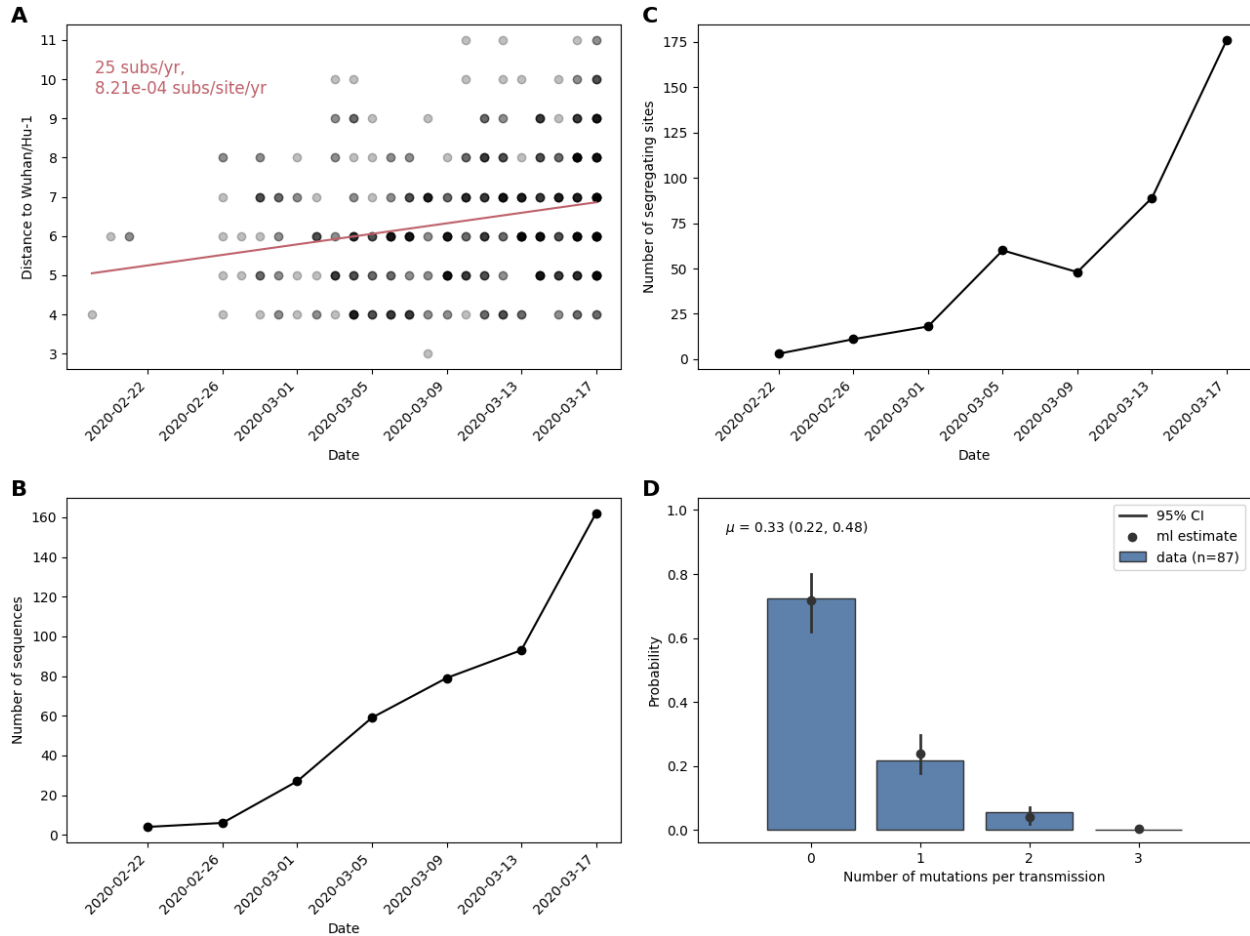

649

650 **Figure 5. Sequences and parameters used in the estimation of  $R_0$  and  $t_0$  for the France data. (A)**

651 Sequences used in the phylodynamic analysis, plotted by their collection date and their nucleotide

652 divergence from the Wuhan/Hu-1 reference sequence. (B) The number of sampled sequences over time,

653 calculated using a  $T = 4$  day time window. (C) The segregating site trajectory calculated from the sampled

654 sequences, using the same  $T = 4$  day time window shown in (B). (D) Estimation of the per genome, per

655 transmission mutation rate  $\mu$ . Blue histogram plots the fraction of transmission pairs with consensus

656 sequences that differed from one another by the number of mutations shown on the x-axis. The Poisson

657 estimate from these data, shown in black, was  $\mu = 0.33$  (95% CI = 0.22-0.48).

658

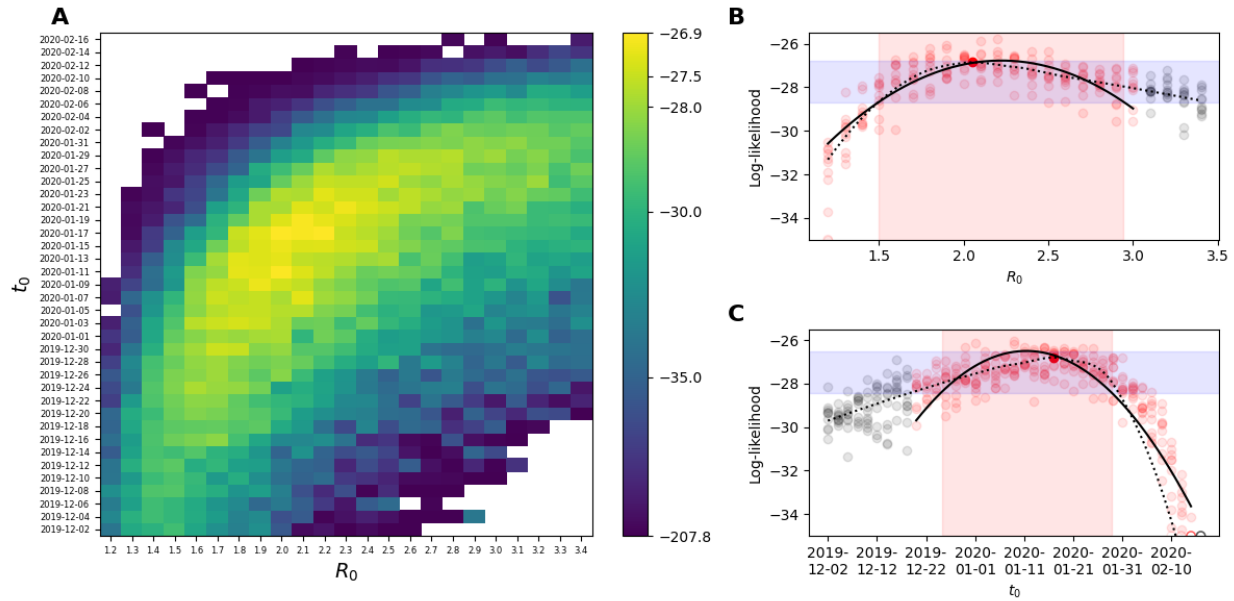

659

660 **Figure 6. Joint estimation of the basic reproduction number  $R_0$  and the timing of the index case  $t_0$  using**  
661 **the France data.** (A) The joint log-likelihood surface based on the estimated segregating site trajectory for  
662 the France data. Each cell is colored according to the mean of log-likelihood for a  $t_0$ ,  $R_0$  combination  
663 obtained from 10 SMC simulations. (B-C) Profile likelihood for  $R_0$  (B) and  $t_0$  (C). Profile likelihoods were  
664 calculated using an approach similar to the one outlined in Ionides et al. (2017). The LOESS fit is shown  
665 with a dotted black line. The quadratic fit is shown with a solid black line. Points included in the quadratic  
666 fit are shown in red; points excluded from the quadratic fit are shown in black. The shaded red and blue  
667 areas are, as in Figures 3B and 3C, the 95% confidence interval for the focal parameter and the range of  
668 log-likelihood values that fall within 1.92 log-likelihood values of the quadratic fit's maximum value.

669

670

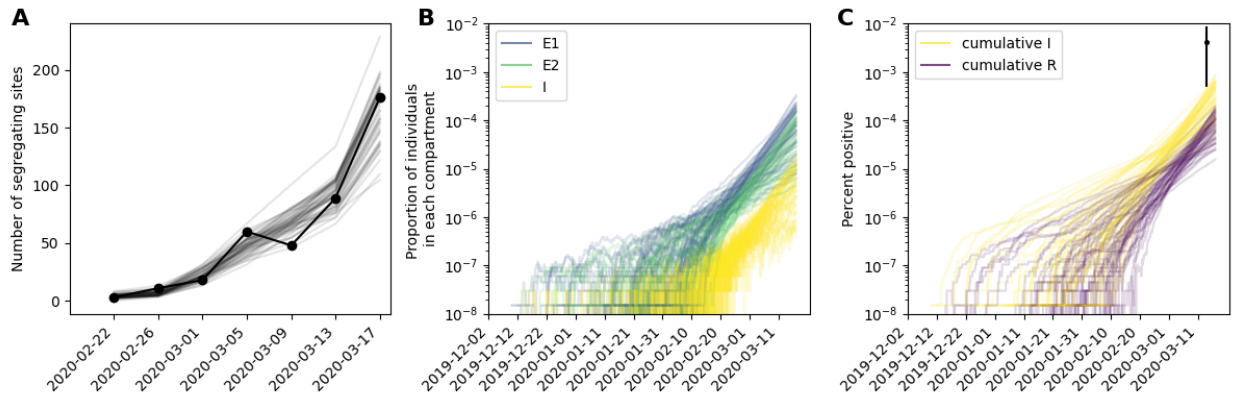

671

672 **Figure 7. Trajectories of reconstructed unobserved state variable for the France data.** For the  
673 reconstruction of all state variables shown, a combination of two parameters,  $R_0$  and  $t_0$ , are sampled  
674 based on their log-likelihood values from 10 SMC simulations. (A) Segregating site trajectory for the France  
675 data, alongside segregating site trajectories from 10 sampled SMC particles. (B) Reconstructed dynamics  
676 of the number of individuals in the first exposed class ( $E_1$ ), the second exposed class ( $E_2$ ), and the infected  
677 class ( $I$ ). (C) Cumulative number of exposed individuals (yellow) and cumulative number of recovered  
678 individuals (purple) over time. The maximum likelihood estimate of the fraction of the population that  
679 had been infected with SARS-CoV-2 by mid-March, and the 95% confidence interval of this estimate, are  
680 shown in black. Estimates are from a serological study conducted during the time window March 9-15,  
681 2020 (Le Vu et al. 2021).

682

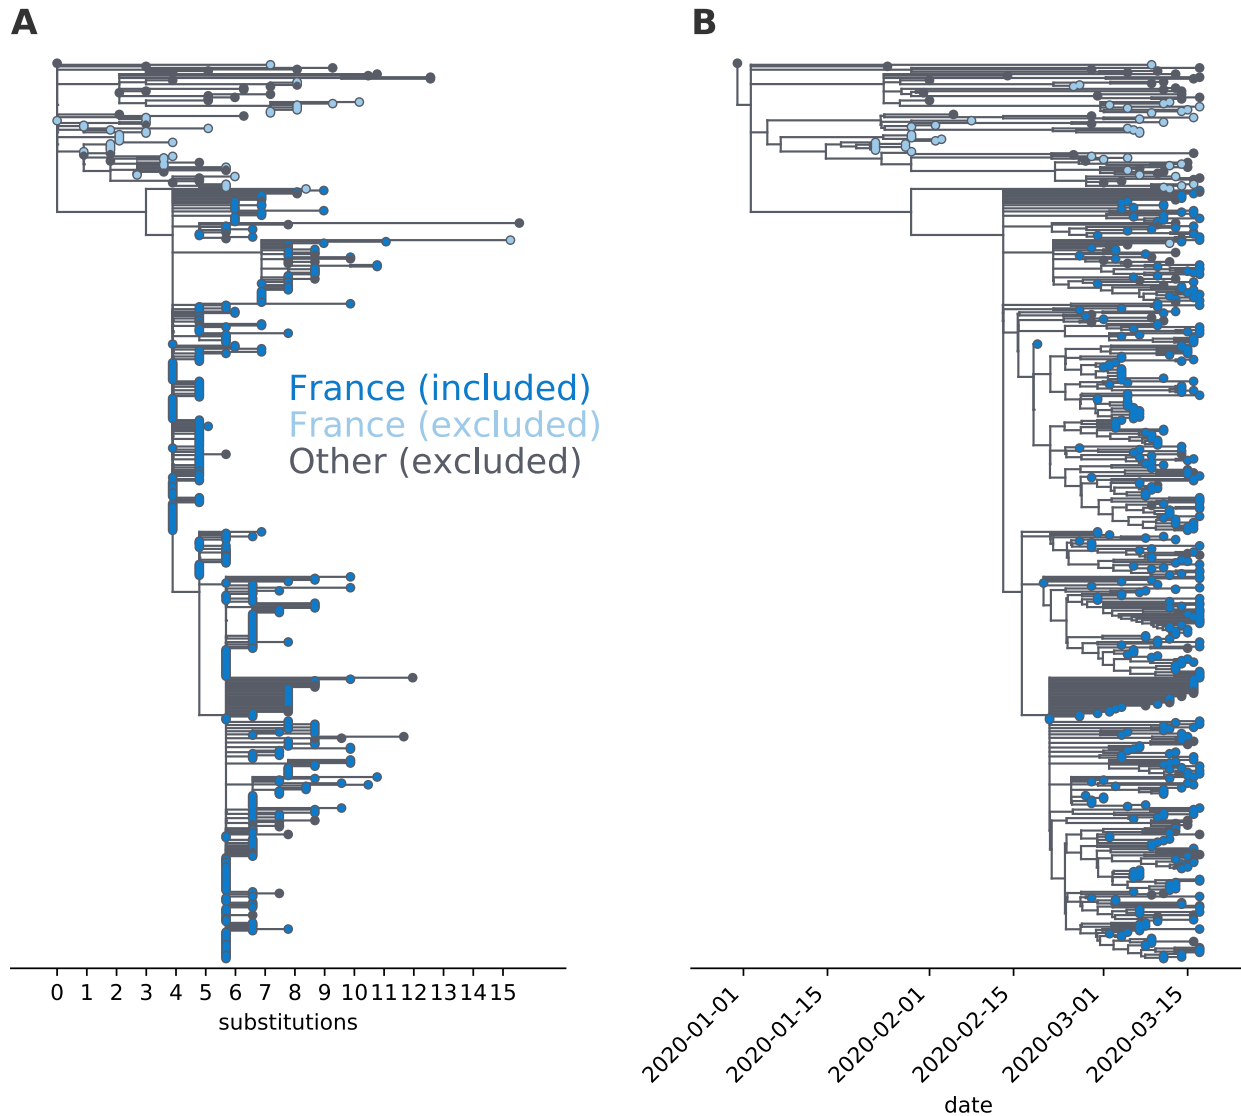

683

684 **Figure S1.** Inferred phylogenies for the sequences sampled from France, January 23-March 17, 2020. (A)

685 Divergence tree, showing the number of nucleotide substitutions from Wuhan/Hu-1. Sequences from

686 France are colored in blue, with dark blue coloring indicating sequences that were included in our single-

687 lineage analysis and light blue coloring indicating sequences that were excluded from our analysis. Tips

688 colored in gray denote genetically similar sequences sampled from outside of France during this time

689 period. (B) Time-aligned maximum likelihood phylogeny, with coloring of sequences as in (A).

690

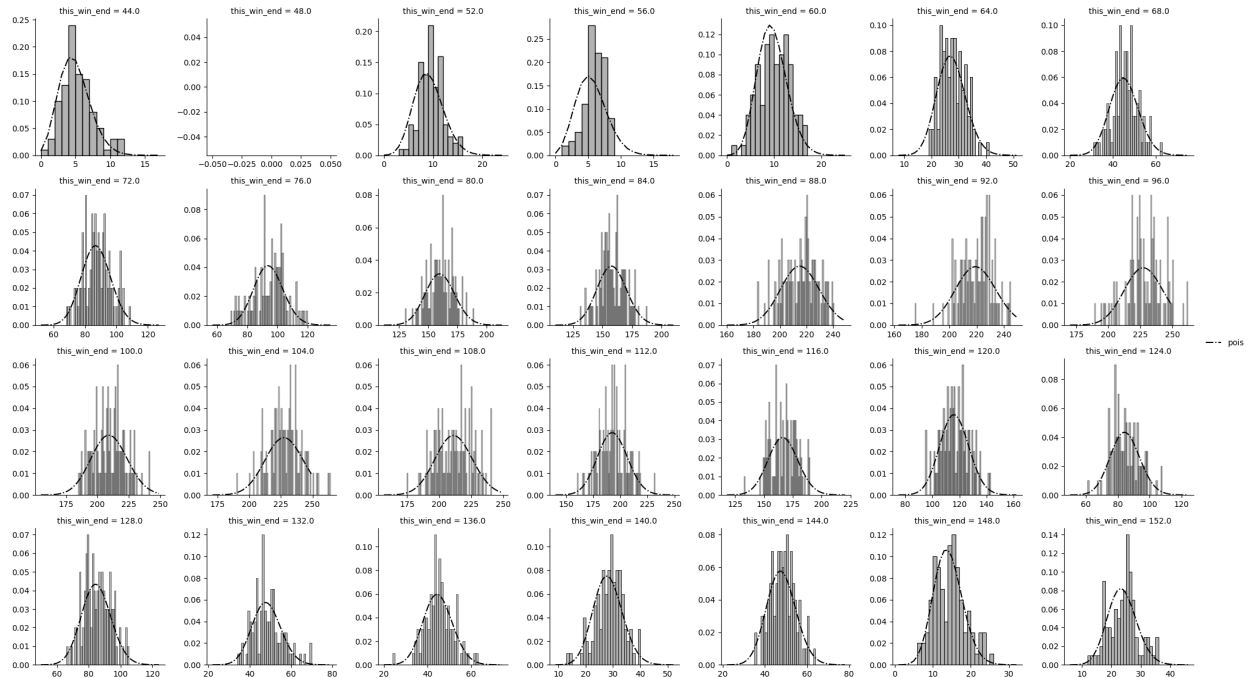

691

692 **Figure S2. Appropriateness of the Poisson distribution in the observation model.** Each subplot shows a  
693 time window  $i$ , with the blue vertical line indicating the observed value in that time window,  $S_i$ . Each time  
694 window further shows a histogram of  $S_i^{\text{sim}}$  values from 100 'grabs' from a single randomly sampled particle.  
695 The dash-dotted black curves show Poisson probability mass functions, parameterized with the average  
696 of the  $S_i^{\text{sim}}$  values.

697

698 **Table S1.** Transmission pairs used to estimate the per genome, per transmission event mutation rate  $\mu$ .  
699 Accession numbers of the consensus sequences from the donor and the recipient of the transmission pair  
700 are provided.

701

702

## 703 References

704 Adam DC, Wu P, Wong JY, Lau EHY, Tsang TK, Cauchemez S, Leung GM, Cowling BJ. 2020. Clustering and  
705 superspreading potential of SARS-CoV-2 infections in Hong Kong. *Nat Med* 26:1714–1719.

706 Althouse BM, Wenger EA, Miller JC, Scarpino SV, Allard A, Hébert-Dufresne L, Hu H. 2020.  
707 Superspreading events in the transmission dynamics of SARS-CoV-2: Opportunities for  
708 interventions and control. *PLoS Biol* 18:e3000897.



- 709 Boskova V, Bonhoeffer S, Stadler T. 2014. Inference of epidemiological dynamics based on simulated  
710 phylogenies using birth-death and coalescent models. Koelle K, editor. *PLoS Computational*  
711 *Biology* 10:e1003913.
- 712 Bouckaert R, Heled J, Kühnert D, Vaughan T, Wu C-H, Xie D, Suchard MA, Rambaut A, Drummond AJ.  
713 2014. BEAST 2: a software platform for Bayesian evolutionary analysis. Prlic A, editor. *PLoS*  
714 *Computational Biology* 10:e1003537.
- 715 Braun K, Moreno G, Wagner C, Accola MA, Rehrauer WM, Baker D, Koelle K, O'Connor DH, Bedford T,  
716 Friedrich TC, et al. 2021. Limited within-host diversity and tight transmission bottlenecks limit  
717 SARS-CoV-2 evolution in acutely infected individuals. *Evolutionary Biology* Available from:  
718 <http://biorxiv.org/lookup/doi/10.1101/2021.04.30.440988>
- 719 Danesh G, Elie B, Michalakis Y, Sofonea MT, Bal A, Behillil S, Destras G, Boutolleau D, Burrel S, Marcelin  
720 A-G, et al. 2020. Early phylodynamics analysis of the COVID-19 epidemic in France. *Epidemiology*  
721 Available from: <http://medrxiv.org/lookup/doi/10.1101/2020.06.03.20119925>
- 722 Duchene S, Featherstone L, Haritopoulou-Sinanidou M, Rambaut A, Lemey P, Baele G. 2020. Temporal  
723 signal and the phylodynamic threshold of SARS-CoV-2. *Virus Evolution* 6:veaa061.
- 724 Gámbaro F, Behillil S, Baidaliuk A, Donati F, Albert M, Alexandru A, Vanpeene M, Bizard M, Brisebarre A,  
725 Barbet M, et al. 2020. Introductions and early spread of SARS-CoV-2 in France, 24 January to 23  
726 March 2020. *Eurosurveillance* [Internet] 25. Available from:  
727 <https://www.eurosurveillance.org/content/10.2807/1560-7917.ES.2020.25.26.2001200>
- 728 Geidelberg L, Boyd O, Jorgensen D, Siveroni I, Nascimento FF, Johnson R, Ragonnet-Cronin M, Fu H,  
729 Wang H, Xi X, et al. 2021. Genomic epidemiology of a densely sampled COVID-19 outbreak in  
730 China. *Virus Evolution* 7:veaa102.
- 731 Gonzalez-Reiche AS, Hernandez MM, Sullivan MJ, Ciferri B, Alshammary H, Obla A, Fabre S, Kleiner G,  
732 Polanco J, Khan Z, et al. 2020. Introductions and early spread of SARS-CoV-2 in the New York City  
733 area. *Science*:eabc1917.
- 734 Griffin JM, Collins AB, Hunt K, McEvoy D, Casey M, Byrne AW, McAloon CG, Barber A, Lane EA, More SJ.  
735 2020. A rapid review of available evidence on the serial interval and generation time of COVID-  
736 19. *Epidemiology* Available from: <http://medrxiv.org/lookup/doi/10.1101/2020.05.08.20095075>
- 737 Harris CR, Millman KJ, van der Walt SJ, Gommers R, Virtanen P, Cournapeau D, Wieser E, Taylor J, Berg S,  
738 Smith NJ, et al. 2020. Array programming with NumPy. *Nature* 585:357–362.
- 739 Hilton J, Keeling MJ. 2020. Estimation of country-level basic reproductive ratios for novel Coronavirus  
740 (SARS-CoV-2/COVID-19) using synthetic contact matrices. *PLoS Comput Biol* 16:e1008031.
- 741 Hunter JD. 2007. Matplotlib: A 2D Graphics Environment. *Comput. Sci. Eng.* 9:90–95.
- 742 Ionides EL, Breto C, Park J, Smith RA, King AA. 2017. Monte Carlo profile confidence intervals for  
743 dynamic systems. *Journal of The Royal Society Interface* 14:20170126.

- 744 James SE, Ngcapu S, Kanzi AM, Tegally H, Fonseca V, Giandhari J, Wilkinson E, Chimukangara B, Pillay S,  
745 Singh L, et al. 2020. High Resolution analysis of Transmission Dynamics of Sars-Cov-2 in Two  
746 Major Hospital Outbreaks in South Africa Leveraging Intra-host Diversity. *Infectious Diseases*  
747 (except HIV/AIDS) Available from:  
748 <http://medrxiv.org/lookup/doi/10.1101/2020.11.15.20231993>
- 749 Kalyaanamoorthy S, Minh BQ, Wong TKF, von Haeseler A, Jermini LS. 2017. ModelFinder: fast model  
750 selection for accurate phylogenetic estimates. *Nat Methods* 14:587–589.
- 751 Katoh K. 2002. MAFFT: a novel method for rapid multiple sequence alignment based on fast Fourier  
752 transform. *Nucleic Acids Research* 30:3059–3066.
- 753 Keeling MJ, Rohani P. 2008. *Modeling Infectious Diseases in Humans and Animals*. Princeton University  
754 Press
- 755 Kim K, Omori R, Ito K. 2017. Inferring epidemiological dynamics of infectious diseases using Tajima’s D  
756 statistic on nucleotide sequences of pathogens. *Epidemics* 21:21–29.
- 757 Koelle K, Rasmussen DA. 2012. Rates of coalescence for common epidemiological models at equilibrium.  
758 *J. R. Soc. Interface* 9:997–1007.
- 759 Kucharski AJ, Russell TW, Diamond C, Liu Y, Edmunds J, Funk S, Eggo RM, Sun F, Jit M, Munday JD, et al.  
760 2020. Early dynamics of transmission and control of COVID-19: a mathematical modelling study.  
761 *The Lancet Infectious Diseases* 20:553–558.
- 762 Le Vu S, Jones G, Anna F, Rose T, Richard J-B, Bernard-Stoecklin S, Goyard S, Demeret C, Helynck O,  
763 Escriou N, et al. 2021. Prevalence of SARS-CoV-2 antibodies in France: results from nationwide  
764 serological surveillance. *Nat Commun* 12:3025.
- 765 Lemieux JE, Siddie KJ, Shaw BM, Loreth C, Schaffner SF, Gladden-Young A, Adams G, Fink T, Tomkins-  
766 Tinch CH, Krasilnikova LA, et al. 2021. Phylogenetic analysis of SARS-CoV-2 in Boston highlights  
767 the impact of superspreading events. *Science* 371.
- 768 Li LM, Grassly NC, Fraser C. 2017. Quantifying Transmission Heterogeneity Using Both Pathogen  
769 Phylogenies and Incidence Time Series. *Molecular Biology and Evolution* 34:2982–2995.
- 770 Lloyd-Smith JO, Schreiber SJ, Kopp PE, Getz WM. 2005. Superspreading and the effect of individual  
771 variation on disease emergence. *Nature* 438:355–359.
- 772 Locatelli I, Trächsel B, Rousson V. 2021. Estimating the basic reproduction number for COVID-19 in  
773 Western Europe. Khudyakov YE, editor. *PLoS ONE* 16:e0248731.
- 774 Lythgoe KA, Hall M, Ferretti L, de Cesare M, MacIntyre-Cockett G, Trebes A, Andersson M, Otecko N,  
775 Wise EL, Moore N, et al. 2021. SARS-CoV-2 within-host diversity and transmission. *Science*  
776 372:eabg0821.
- 777 Miller D, Martin MA, Harel N, Tirosh O, Kustin T, Meir M, Sorek N, Gefen-Halevi S, Amit S, Vorontsov O,  
778 et al. 2020. Full genome viral sequences inform patterns of SARS-CoV-2 spread into and within  
779 Israel. *Nat Commun* 11:5518.

- 780 Minh BQ, Schmidt HA, Chernomor O, Schrempf D, Woodhams MD, von Haeseler A, Lanfear R. 2020. IQ-  
781 TREE 2: New Models and Efficient Methods for Phylogenetic Inference in the Genomic  
782 Era. Teeling E, editor. *Molecular Biology and Evolution* 37:1530–1534.
- 783 Pekar J, Worobey M, Moshiri N, Scheffler K, Wertheim JO. 2020. Timing the SARS-CoV-2 Index Case in  
784 Hubei Province. *Evolutionary Biology* Available from:  
785 <http://biorxiv.org/lookup/doi/10.1101/2020.11.20.392126>
- 786 Popa A, Genger J-W, Nicholson MD, Penz T, Schmid D, Aberle SW, Agerer B, Lercher A, Endler L, Colaço  
787 H, et al. 2020. Genomic epidemiology of superspreading events in Austria reveals mutational  
788 dynamics and transmission properties of SARS-CoV-2. *Sci. Transl. Med.* 12:eabe2555.
- 789 Poppinga A, Vaughan T, Stadler T, Drummond AJ. 2014. Inferring epidemiological dynamics with Bayesian  
790 coalescent inference: the merits of deterministic and stochastic models. *Genetics*.
- 791 Rasmussen DA, Boni MF, Koelle K. 2014. Reconciling phylodynamics with epidemiology: the case of  
792 dengue virus in southern Vietnam. *Molecular Biology and Evolution* 31:258–271.
- 793 Rasmussen DA, Ratmann O, Koelle K. 2011. Inference for nonlinear epidemiological models using  
794 genealogies and time series. *PLoS Comput Biol* 7:e1002136.
- 795 Rasmussen DA, Stadler T. Coupling adaptive molecular evolution to phylodynamics using fitness-  
796 dependent birth-death models. *Evolutionary Biology*:24.
- 797 Ratmann O, Hodcroft EB, Pickles M, Cori A, Hall M, Lycett S, Colijn C, Dearlove B, Didelot X, Frost S, et al.  
798 2017. Phylogenetic Tools for Generalized HIV-1 Epidemics: Findings from the PANGEA-HIV  
799 Methods Comparison. *Molecular Biology and Evolution* 34:185–203.
- 800 Sagulenko P, Puller V, Neher R. 2017. TreeTime: maximum likelihood phylodynamic analysis.
- 801 Salje H, Tran Kiem C, Lefrancq N, Courtejoie N, Bosetti P, Paireau J, Andronico A, Hozé N, Richet J,  
802 Dubost C-L, et al. 2020. Estimating the burden of SARS-CoV-2 in France. *Science* 369:208–211.
- 803 SciPy 1.0 Contributors, Virtanen P, Gommers R, Oliphant TE, Haberland M, Reddy T, Cournapeau D,  
804 Burovski E, Peterson P, Weckesser W, et al. 2020. SciPy 1.0: fundamental algorithms for  
805 scientific computing in Python. *Nat Methods* 17:261–272.
- 806 Shu Y, McCauley J. 2017. GISAID: Global initiative on sharing all influenza data – from vision to reality.  
807 *Eurosurveillance* [Internet] 22. Available from:  
808 <https://www.eurosurveillance.org/content/10.2807/1560-7917.ES.2017.22.13.30494>
- 809 Stadler T. 2010. Sampling-through-time in birth–death trees. *Journal of Theoretical Biology* 267:396–  
810 404.
- 811 Stadler T, Bonhoeffer S. 2013. Uncovering epidemiological dynamics in heterogeneous host populations  
812 using phylogenetic methods. *Phil. Trans. R. Soc. B* [Internet] 368. Available from:  
813 <http://rstb.royalsocietypublishing.org/content/368/1614/20120198>

- 814 Stadler T, Kouyos R, Wyl V von, Yerly S, Böni J, Bürgisser P, Klimkait T, Joos B, Rieder P, Xie D, et al. 2012.  
815 Estimating the basic reproductive number from viral sequence data. *Mol Biol Evol* 29:347–357.
- 816 Stadler T, Kuhnert D, Bonhoeffer S, Drummond AJ. 2013. Birth-death skyline plot reveals temporal  
817 changes of epidemic spread in HIV and hepatitis C virus (HCV). *Proceedings of the National*  
818 *Academy of Sciences* 110:228–233.
- 819 Stadler T, Kühnert D, Rasmussen DA, du Plessis L. 2014. Insights into the Early Epidemic Spread of Ebola  
820 in Sierra Leone Provided by Viral Sequence Data. *PLoS Curr* [Internet]. Available from:  
821 [https://currents.plos.org/outbreaks/article/insights-into-the-early-epidemic-spread-of-ebola-in-](https://currents.plos.org/outbreaks/article/insights-into-the-early-epidemic-spread-of-ebola-in-sierra-leone-provided-by-viral-sequence-data/)  
822 [sierra-leone-provided-by-viral-sequence-data/](https://currents.plos.org/outbreaks/article/insights-into-the-early-epidemic-spread-of-ebola-in-sierra-leone-provided-by-viral-sequence-data/)
- 823 Sun K, Wang W, Gao L, Wang Y, Luo K, Ren L, Zhan Z, Chen X, Zhao S, Huang Y, et al. 2021. Transmission  
824 heterogeneities, kinetics, and controllability of SARS-CoV-2. *Science* 371:eabe2424.
- 825 Vaughan TG, Leventhal GE, Rasmussen DA, Drummond AJ, Welch D, Stadler T. 2017. Directly Estimating  
826 Epidemic Curves From Genomic Data. Available from:  
827 <http://biorxiv.org/lookup/doi/10.1101/142570>
- 828 Volz EM. 2012. Complex population dynamics and the coalescent under neutrality. *Genetics* 190:187–  
829 201.
- 830 Volz EM, Frost SDW. 2014. Sampling through time and phylodynamic inference with coalescent and  
831 birth-death models. *Journal of The Royal Society Interface* 11:20140945–20140945.
- 832 Volz EM, Ndembu N, Nowak R, Kijak GH, Idoko J, Dakum P, Royal W, Baral S, Dybul M, Blattner WA, et al.  
833 2017. Phylodynamic analysis to inform prevention efforts in mixed HIV epidemics. *Virus*  
834 *Evolution* [Internet] 3. Available from: [https://academic.oup.com/ve/article-](https://academic.oup.com/ve/article-lookup/doi/10.1093/ve/vex014)  
835 [lookup/doi/10.1093/ve/vex014](https://academic.oup.com/ve/article-lookup/doi/10.1093/ve/vex014)
- 836 Volz EM, Siveroni I. 2018. Bayesian phylodynamic inference with complex models. Darling AE, editor.  
837 *PLoS Comput Biol* 14:e1006546.
- 838 Woolhouse MEJ, Dye C, Etard J-F, Smith T, Charlwood JD, Garnett GP, Hagan P, Hii JLK, Ndhlovu PD,  
839 Quinell RJ, et al. 1997. Heterogeneities in the transmission of infectious agents: Implications for  
840 the design of control programs. *Proceedings of the National Academy of Sciences* 94:338–342.
- 841 Wu F, Zhao S, Yu B, Chen Y-M, Wang W, Song Z-G, Hu Y, Tao Z-W, Tian J-H, Pei Y-Y, et al. 2020. A new  
842 coronavirus associated with human respiratory disease in China. *Nature* 579:265–269.
- 843
